# Supplementary material
Source: PubMed Central journal article supplement (PMC5528964)
Supplement: MOL2-10-360-s002.pdf [file MOL2-10-360-s002.pdf]

# Supplementary Figure S2

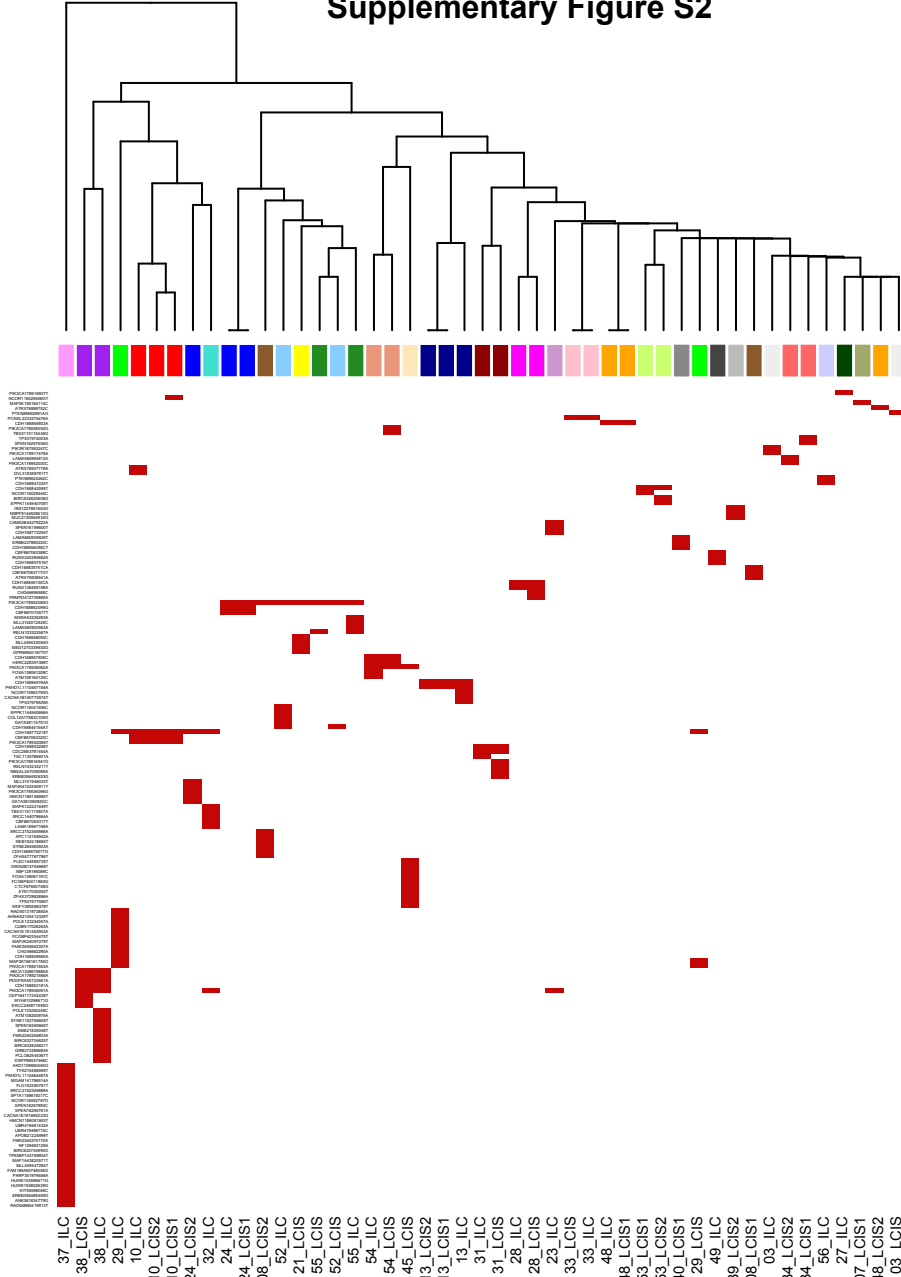

Cases/patients

- Case 03
- Case 07
- Case 08
- Case 10
- Case 13
- Case 21
- Case 23
- Case 24
- Case 27
- Case 28
- Case 29
- Case 31
- Case 32
- Case 33
- Case 34
- Case 37
- Case 38
- Case 39
- Case 40
- Case 45
- Case 48
- Case 49
- Case 52
- Case 53
- Case 54
- Case 55
- Case 56

Heatmap colors

Mutation
