# Supplementary material
Source: PubMed Central journal article supplement (PMC5528964)

Supplementary Figure S1

CDH1

- splice-site
- nonsense
- frame-shift

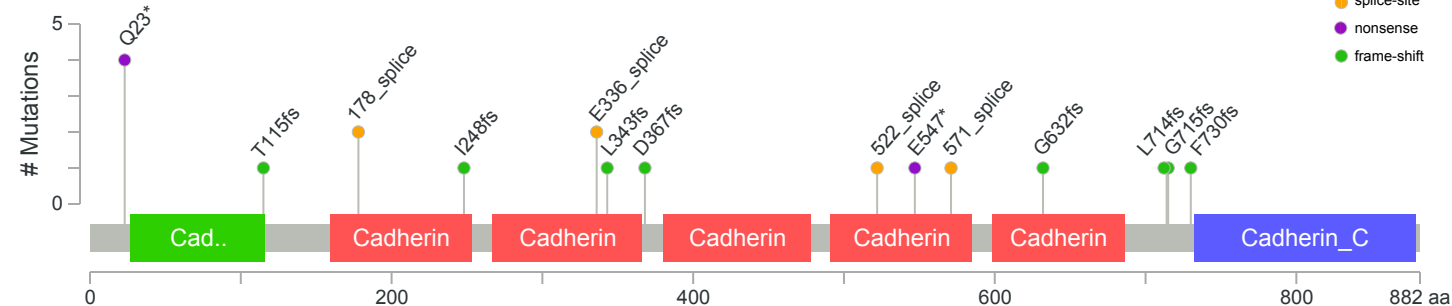

Supplement: MOL2-10-360-s001.pdf [file MOL2-10-360-s001.pdf]
